# Supplementary material for: Enhanced osteogenesis of mesenchymal stem cells on electrospun cellulose nanocrystals/poly(ε-caprolactone) nanofibers on graphene oxide substrates
Source: Royal Society of Chemistry journal article supplement (doi:10.1039/c9ra06260b), 2019-01-01
Supplement: c9ra06260b1.pdf [file c9ra06260b1.pdf]

**Supplementary Information:**

**Enhanced Osteogenesis of Mesenchymal Stem Cells on Electrospun Cellulose Nanocrystals/Poly( $\epsilon$ -caprolactone) Nanofibers on Graphene Oxide Substrates**

Dinesh K. Patel,<sup>1+</sup> Yu-Ri Seo<sup>2+</sup>, Sayan Deb Dutta<sup>2</sup>, and Ki-Taek Lim<sup>2\*</sup>

*<sup>1</sup>The Institute of Forest Science, Kangwon National University, Chuncheon-24341, Republic of Korea.*

*<sup>2</sup>Department of Biosystems Engineering, College of Agriculture and Life Sciences, Kangwon National University, Chuncheon-24341, Republic of Korea.*

**<sup>+</sup>equivalent authors**

**Corresponding Author:**

\*Email address: [ktlim@kangwon.ac.kr](mailto:ktlim@kangwon.ac.kr)

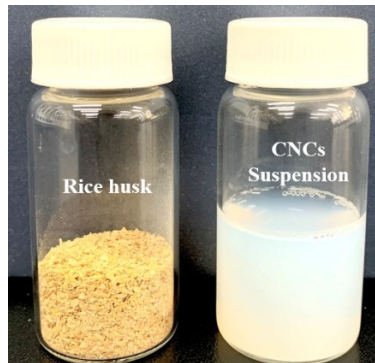

**Supplementary Fig. 1.** The photographs of the pure rice husk and CNCs suspension.

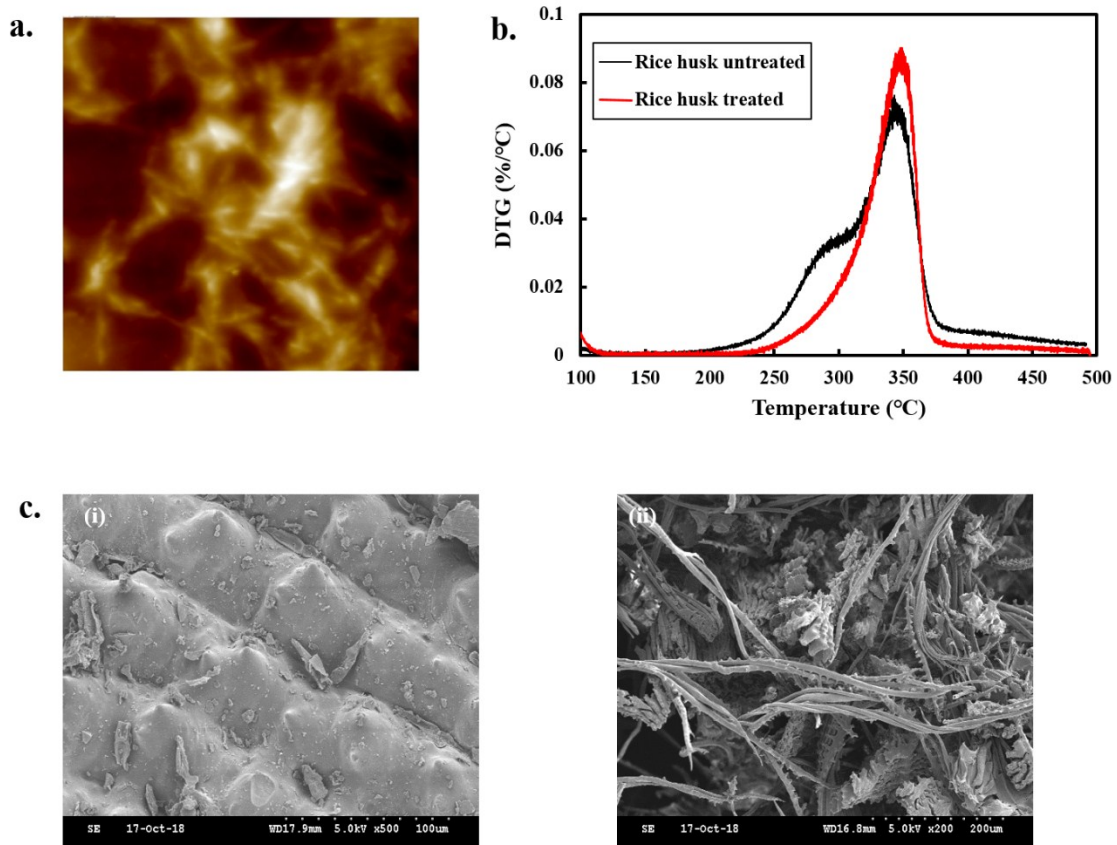

**Supplementary Fig. 2.** (a) AFM image of rice husk-derived CNCs ( $20 \times 20 \mu\text{m}^2$ ), (b) DTA curve of the pure rice husk and chemically treated sample, and (c) SEM morphologies (i & ii) of the pure rice husk and the chemically treated sample, respectively.

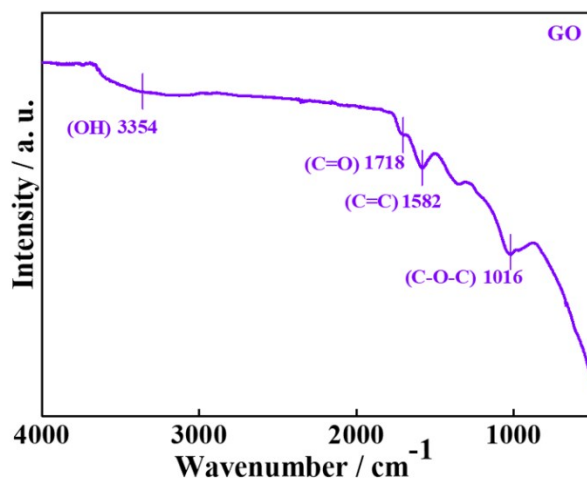

**Supplementary Fig. 3.** The FTIR spectrum of the prepared graphene oxide with indicated chemical moieties.

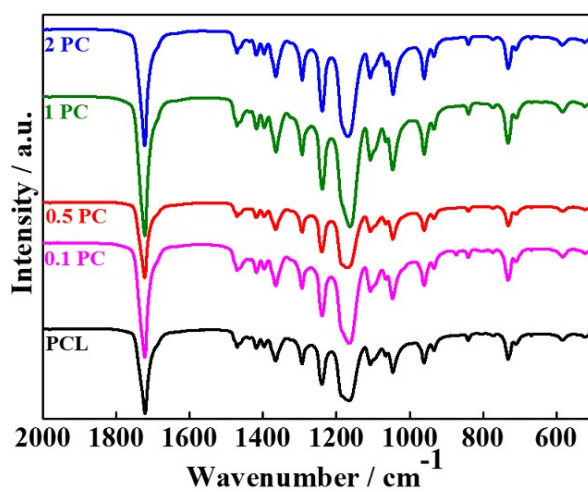

**Supplementary Fig. 4.** The FTIR spectra of pure PCL and its indicated electrospun composite scaffolds.

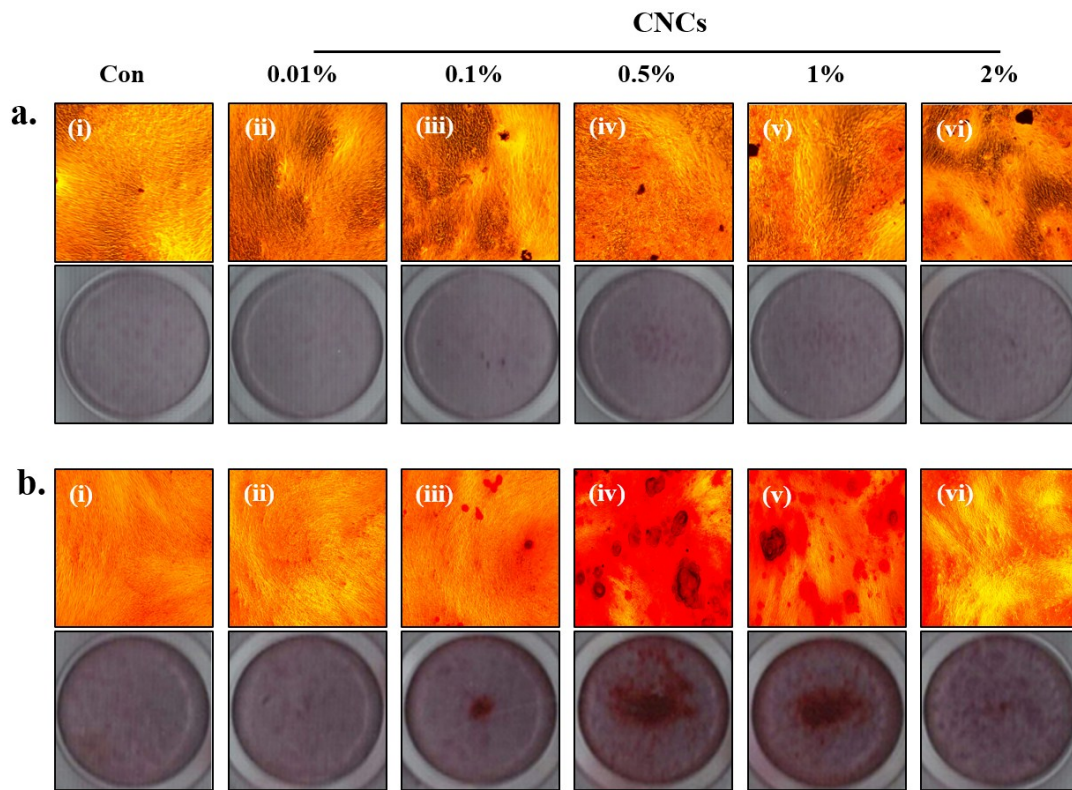

**Supplementary Fig. 5.** Mineralized nodule formation stained by Alizarin Red S. hMSCs treated with CNCs for **(a)** 7 and **(b)** 14 days: **(i)** control, **(ii)** 0.01% CNCs, **(iii)** 0.1% CNCs, **(iv)** 0.5% CNCs, **(v)** 1% CNCs, and **(vi)** 2% CNCs.

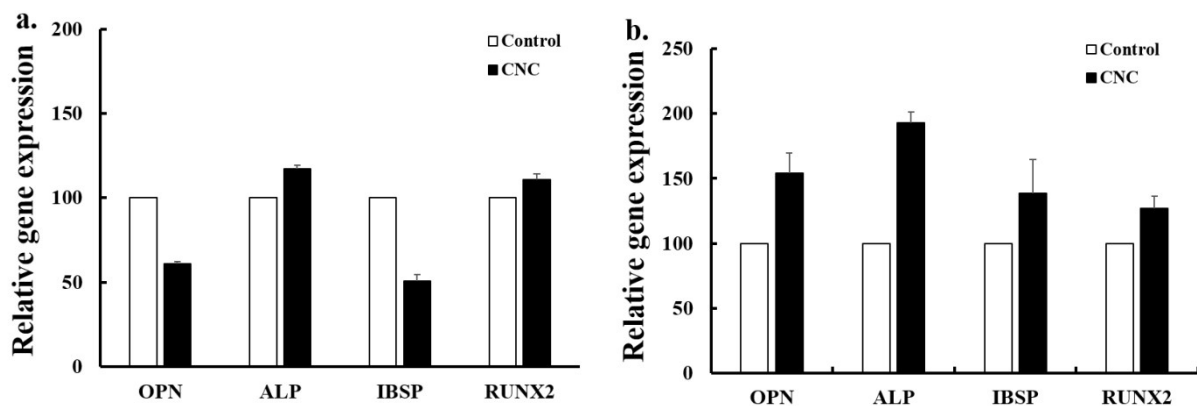

**Supplementary Fig. 6.** PCR analysis for the expression of osteogenic differentiation-specific genes under the induced conditions **(a)** 7 and **(b)** 14 days.

**Table:**

| Step | Speed (rpm) | Time (s) | Ramp (s) |
|------|-------------|----------|----------|
| 1    | 2000        | 30       | 10       |
| 2    | 3000        | 30       | 10       |
| 3    | 4000        | 30       | 10       |
| 4    | 5000        | 30       | 10       |
| 5    | 6000        | 30       | 10       |
| 6    | 4000        | 30       | 10       |
| 7    | 0           | 30       | 10       |

**Supplementary Table 1.** Conditions for graphene oxides coating on a glass substrate.

| Name  |     | Sequence (5'-3')     | Accession No. | Product size (bp) |
|-------|-----|----------------------|---------------|-------------------|
| ALP   | (F) | GGACATGCAGTACGAGCTGA | BC090861      | 357               |
|       | (R) | GCAGTGAAGGGCTTCTTGTC |               |                   |
| OPN   | (F) | CCCACAGACCCTTCCAAGTA | J04765        | 279               |
|       | (R) | ACACTATCACCTCGGCCATC |               |                   |
| IBSP  | (F) | CAACAGCACAGAGGCAGAAA | NM_004967     | 248               |
|       | (R) | CGTACTCCCCCTCGTATTCA |               |                   |
| RUNX2 | (F) | CGCATTCTCATCCCAGTAT  | NM_001015051  | 432               |
|       | (R) | GACTGGCGGGGTGTAAGTAA |               |                   |

**Supplementary Table 2.**Primer sequences used in the reverse transcription polymerase chain reaction.
